# Supplementary material
Source: ML conference proceedings conference paper supplement (https://openaccess.thecvf.com/content/CVPR2023/html/Feng_Shape-Erased_Feature_Learning_CVPR_2023_paper.html)
Supplement: Supplementary file 1 [file Feng_Shape-Erased_Feature_Learning_CVPR_2023_supplemental.pdf]

## Supplementary Material for Shape-Erased Feature Learning for Visible-Infrared Person Re-Identification

### A. On Minimizing $I(Z_{se}^{(i)}; Y; X^{(s)})$

In Appendix A, we will proof  $I(Z_{se}^{(i)}; Y; X^{(s)})$  can be approximately upper-bounded by 0, so that  $\max I(Z_{se}^{(i)}; Y|X^{(s)})$  can be lower-bounded by  $\max I(Z_{se}^{(i)}; Y)$  (Eq. (4), (13) in the paper). We first enumerate the following four hypotheses for minimizing  $I(Z_{se}^{(i)}; Y; X^{(s)})$ .

*Hypothesis:*

1. Following [1], if  $Z^{(s)}$  is a representation of  $X^{(s)}$ , then we state that  $Z^{(s)}$  is conditionally independent from any other variable in the system once  $X^{(s)}$  is observed (e.g.  $Z^{(s)}$  can be a deterministic function of  $X^{(s)}$ ):

$$\forall A, B, \quad I(A; Z^{(s)}|X^{(s)}, B) = 0.$$

2. (Eq. (6) in the paper)  $Z^{(s)}$  is a *sufficient* representation of  $X^{(s)}$  for  $Y$ , i.e.,  $I(Y; X^{(s)}|Z^{(s)}) = 0$ .

3. (Eq. (8) in the paper)  $Z_{sr}^{(i)}$  can fully represent  $Z^{(s)}$ , i.e.,  $Z^{(s)} \equiv Z_{sr}^{(i)}$ .

4. (Eq. (1), (2) in the paper) The orthogonality between  $z_{se}^{(i)}$  and  $z_{sr}^{(i)}$  can be regarded as a relaxation of independence, i.e.,

$$\forall (z_{sr}^{(i)}, z_{se}^{(i)}) \sim (Z_{sr}^{(i)}, Z_{se}^{(i)}), \quad z_{sr}^{(i)} \perp z_{se}^{(i)} \implies I(Z_{sr}^{(i)}; Z_{se}^{(i)}) \approx 0.$$

*Hypothesis 2* can be satisfied by **Proposition 1** in Appendix B. To approximate *Hypothesis 3*, we minimize element-wise mean squared error (MSE) between them (Eq. (9) in the paper), and it is to be noted that the gradient of  $z^{(s)}$  is discarded.

**Theorem 1.** *If representation  $Z^{(s)}$  of  $X^{(s)}$  is sufficient for  $Y$ , then  $I(Z_{se}^{(i)}; Y; X^{(s)}) = I(Z_{se}^{(i)}; Y; Z^{(s)})$ .*

*Proof.* Obviously,  $I(Z_{se}^{(i)}; Y; X^{(s)}) \geq I(Z_{se}^{(i)}; Y; Z^{(s)})$  holds due to data processing inequality ( $X^{(s)} \rightarrow Z^{(s)}$ ). On the other side,  $I(Z_{se}^{(i)}; Y; X^{(s)})$  can be factorized into two terms by introducing  $Z^{(s)}$ :

$$I(Z_{se}^{(i)}; Y; X^{(s)}) = I(Z_{se}^{(i)}; Y; X^{(s)}|Z^{(s)}) + I(Z_{se}^{(i)}; Y; X^{(s)}; Z^{(s)}). \quad (\text{A.1})$$

For the first term of RHS in Eq. (A.1):

$$\begin{aligned} I(Z_{se}^{(i)}; Y; X^{(s)}|Z^{(s)}) &= I(Y; X^{(s)}|Z^{(s)}) - I(Y; X^{(s)}|Z_{se}^{(i)}, Z^{(s)}) \\ &= 0 - I(Y; X^{(s)}|Z_{se}^{(i)}, Z^{(s)}) \leq 0, \end{aligned} \quad (\text{A.2})$$

where  $I(Y; X^{(s)}|Z^{(s)}) = 0$  using the definition of *sufficiency*; For the second term of RHS in Eq. (A.1):

$$I(Z_{se}^{(i)}; Y; X^{(s)}; Z^{(s)}) = I(Z_{se}^{(i)}; Y; Z^{(s)}) - I(Z_{se}^{(i)}; Y; Z^{(s)}|X^{(s)}). \quad (\text{A.3})$$

For the second term of RHS in Eq. (A.3):

$$\begin{aligned} I(Z_{se}^{(i)}; Y; Z^{(s)}|X^{(s)}) &= I(Y; Z^{(s)}|X^{(s)}) - I(Y; Z^{(s)}|X^{(s)}, Z_{se}^{(i)}) \\ &= 0 - 0 = 0, \end{aligned} \quad (\text{A.4})$$

where  $I(Y; Z^{(s)}|X^{(s)}) = I(Y; Z^{(s)}|X^{(s)}, Z_{se}^{(i)}) = 0$  as  $Z^{(s)}$  is a representation of  $X^{(s)}$  using *Hypothesis 1*. Therefore, combining Eq. (A.1) - (A.4) concludes:

$$I(Z_{se}^{(i)}; Y; X^{(s)}) = I(Z_{se}^{(i)}; Y; Z^{(s)}). \quad (\text{A.5})$$

□

Following **Theorem 1**, and using *Hypothesis 3* and *4*, we have:

$$I(Z_{se}^{(i)}; Y; X^{(s)}) = I(Z_{se}^{(i)}; Y; Z_{sr}^{(i)}) \leq I(Z_{se}^{(i)}; Z_{sr}^{(i)}) \approx 0. \quad (\text{A.6})$$

Based on the above analysis, it is concluded that  $I(Z_{se}^{(i)}; Y; X^{(s)})$  can be upper-bounded by  $I(Z_{se}^{(i)}; Z_{sr}^{(i)}) \approx 0$ .

## B. On Loss Functions

In Section 3, we maximize mutual information between representation and label by minimizing cross-entropy loss (Eq. (5), (7) in the paper). We formulate this approximation as the following **Proposition 1**.

**Proposition 1.** *Let  $X$  and  $Y$  be random variables with domain  $\mathcal{X}$  and  $\mathcal{Y}$ , respectively. Let  $Z$  be a representation of  $X$ . Then, maximizing  $I(Z; Y)$  can be approximated by minimizing cross-entropy loss of  $q(y|z)$  given observations from  $P(X, Y)$  as  $\{x_j, y_j\}_{j=1}^N$ .  $q(y|z)$  is regarded as classifier in practical.*

*Proof.* Using the definitions of mutual information and entropy:

$$\max I(Z; Y) = H(Y) - H(Y|Z), \quad (\text{B.1})$$

and as  $H(Y)$  will not change if domain  $\mathcal{Y}$  does not change, maximizing  $I(Z; Y)$  is equivalent to minimizing  $H(Y|Z)$ :

$$\begin{aligned} \min H(Y|Z) &= \int p(z)H(Y|Z = z)dz \\ &= - \iint p(z)p(y|z) \log p(y|z) dydz. \end{aligned} \quad (\text{B.2})$$

As  $D_{KL}(p(y|z)||q(y|z)) = \int p(y|z) \log p(y|z) - p(y|z) \log q(y|z) dz \geq 0$  holds identically:

$$\begin{aligned} \min H(Y|Z) &= - \iint p(z)p(y|z) \log p(y|z) dydz \\ &\leq - \iint p(z)p(y|z) \log q(y|z) dydz \\ &= - \iint p(z, y) \log q(y|z) dydz \\ &= - \iiint p(y|x)p(z|x)p(x) \log q(y|z) dx dy dz. \end{aligned} \quad (\text{B.3})$$

The last equation holds for  $Z$  is conditional independent from  $Y$  given  $X$  based on the graphical model illustrated in Section 3 in the paper ( $Y \rightarrow X \rightarrow Z$ ), i.e.,  $p(y, z|x) = p(y|x)p(z|x)$ . For specific observations  $\{x_j, y_j\}_{j=1}^N$  (and note that  $p(z|x)$  is usually represented as a deterministic function), we can approximate the upper bound of  $H(Y|Z)$  by Monte Carlo sampling:

$$\begin{aligned} \min H(Y|Z) &\leq - \iiint p(y|x)p(z|x)p(x) \log q(y|z) dx dy dz \\ &\approx - \frac{1}{N} \sum_{j=1}^N \log q(y_j|z_j), \end{aligned} \quad (\text{B.4})$$

which is a typical form of cross-entropy loss. Therefore, **Proposition 1** holds. □

**Remark.** *For Hypothesis 1 in Appendix A, if the approximation in Proposition 1 is close enough, then we can infer that  $D_{KL}(p(y|x)||q(y|z)) \rightarrow 0^+$ , which indicates the sufficiency of  $Z^{(s)}$  of  $X^{(s)}$  for  $Y$ .*

In Section 3, we minimize cross-view conditional mutual information by minimizing cross-entropy loss (Eq. (10), (11), (14), (15), (17) in the paper). We formulate this approximation as the following **Proposition 2**.

**Proposition 2.** *Let  $X^{(1)}$  and  $X^{(2)}$  be random variables from visible modality and infrared modality (or generally two different views, i.e., modality view and body shape view),  $Y$  be random variable of identity. Let  $Z^{(1)}$  and  $Z^{(2)}$  be representations of  $X^{(1)}$  and  $X^{(2)}$ . Then minimizing  $I(X^{(1)}; Z^{(1)}|X^{(2)})$  can be approximated by minimizing cross-entropy between  $p(y|z^{(2)})$  and  $p(y|z^{(1)})$ .*

*Proof.*

$$\begin{aligned}
I(X^{(1)}; Z^{(1)}|X^{(2)}) &= \iiint p(x^{(1)}, x^{(2)}, z^{(1)}) \log \frac{p(z^{(1)}, x^{(1)}|x^{(2)})}{p(z^{(1)}|x^{(2)})p(x^{(1)}|x^{(2)})} dx^{(1)} dx^{(2)} dz^{(1)} \\
&= \iiint p(x^{(1)}, x^{(2)}, z^{(1)}) \log \frac{p(z^{(1)}|x^{(1)}, x^{(2)})p(x^{(1)}|x^{(2)})}{p(z^{(1)}|x^{(2)})p(x^{(1)}|x^{(2)})} dx^{(1)} dx^{(2)} dz^{(1)} \\
&= \iiint p(x^{(1)}, x^{(2)}, z^{(1)}) \log \frac{p(z^{(1)}|x^{(1)})}{p(z^{(1)}|x^{(2)})} dx^{(1)} dx^{(2)} dz^{(1)} \\
&= \iiint p(x^{(1)}, x^{(2)}, z^{(1)}) \log \frac{p(z^{(1)}|x^{(1)})p(z^{(2)}|x^{(2)})}{p(z^{(1)}|x^{(2)})p(z^{(2)}|x^{(2)})} dx^{(1)} dx^{(2)} dz^{(1)} \tag{B.5} \\
&= \iint p(x^{(1)}, x^{(2)}) D_{KL}(p(z^{(1)}|x^{(1)})||p(z^{(2)}|x^{(2)})) dx^{(1)} dx^{(2)} \\
&\quad - \iint p(x^{(2)}) D_{KL}(p(z^{(1)}|x^{(2)})||p(z^{(2)}|x^{(2)})) dx^{(2)} \\
&\leq \iint p(x^{(1)}, x^{(2)}) D_{KL}(p(z^{(1)}|x^{(1)})||p(z^{(2)}|x^{(2)})) dx^{(1)} dx^{(2)}.
\end{aligned}$$

Thus,  $I(X^{(1)}; Z^{(1)}|X^{(2)})$  can be upper-bounded by  $D_{KL}(p(z^{(1)}|x^{(1)})||p(z^{(2)}|x^{(2)}))$  integrated over  $x^{(1)}, x^{(2)}$ . We can approximate this KL divergence by:

$$\begin{aligned}
D_{KL}(p(y|z^{(1)})||p(y|z^{(2)})) &= \int p(y|z^{(1)}) \log \frac{p(y|z^{(1)})}{p(y|z^{(2)})} dy \\
&= \int p(y|z^{(1)}) \log p(y|z^{(1)}) dy - \int p(y|z^{(1)}) \log p(y|z^{(2)}) dy,
\end{aligned} \tag{B.6}$$

where the first term of RHS of the last equation assumes to be constant, and the second term can be approximated by cross-entropy loss using Monte Carlo sampling similarly in **Proposition 1**. Therefore, **Proposition 2** holds.  $\square$

### C. Comparison to MPANet Using the Same Baseline

We conduct an additional experiment to compare the performances of our method and others using our baseline. We choose MPANet [2], which performed the highest accuracy on SYSU-MM01 among current open-source works. We reproduce it on our baseline. It is demonstrated in Table S1 that our method achieves higher performances compared to MPANet using the same baseline.

| Method      | SYSU-MM01 |       | HITSZ-VCM        |       |                  |       |
|-------------|-----------|-------|------------------|-------|------------------|-------|
|             |           |       | Infrared-Visible |       | Visible-Infrared |       |
|             | Rank-1    | mAP   | Rank-1           | mAP   | Rank-1           | mAP   |
| MPANet      | 70.58     | 68.24 | 46.51            | 35.26 | 50.32            | 37.80 |
| on our base | 71.39     | 67.77 | 58.46            | 45.69 | 61.01            | 46.98 |
| Ours        | 75.18     | 70.12 | 67.65            | 52.30 | 70.23            | 52.54 |

Table S1. Reproduce MPANet on our baseline. All Hyper-parameters have been carefully tuned.

## References

- [1] Marco Federici, Anjan Dutta, Patrick Forré, Nate Kushman, and Zeynep Akata. Learning robust representations via multi-view information bottleneck. In *International Conference on Learning Representations*, 2020. [1](#)
- [2] Qiong Wu, Pingyang Dai, Jie Chen, Chia-Wen Lin, Yongjian Wu, Feiyue Huang, Bineng Zhong, and Rongrong Ji. Discover cross-modality nuances for visible-infrared person re-identification. In *Proceedings of the IEEE/CVF Conference on Computer Vision and Pattern Recognition (CVPR)*, pages 4330–4339, June 2021. [3](#)
